# Supplementary material for: Identification of candidate regulatory sequences in mammalian 3' UTRs by statistical analysis of oligonucleotide distributions
Source: Springer Nature journal article supplement (doi:10.1186/1471-2105-8-174), 2007-05-24

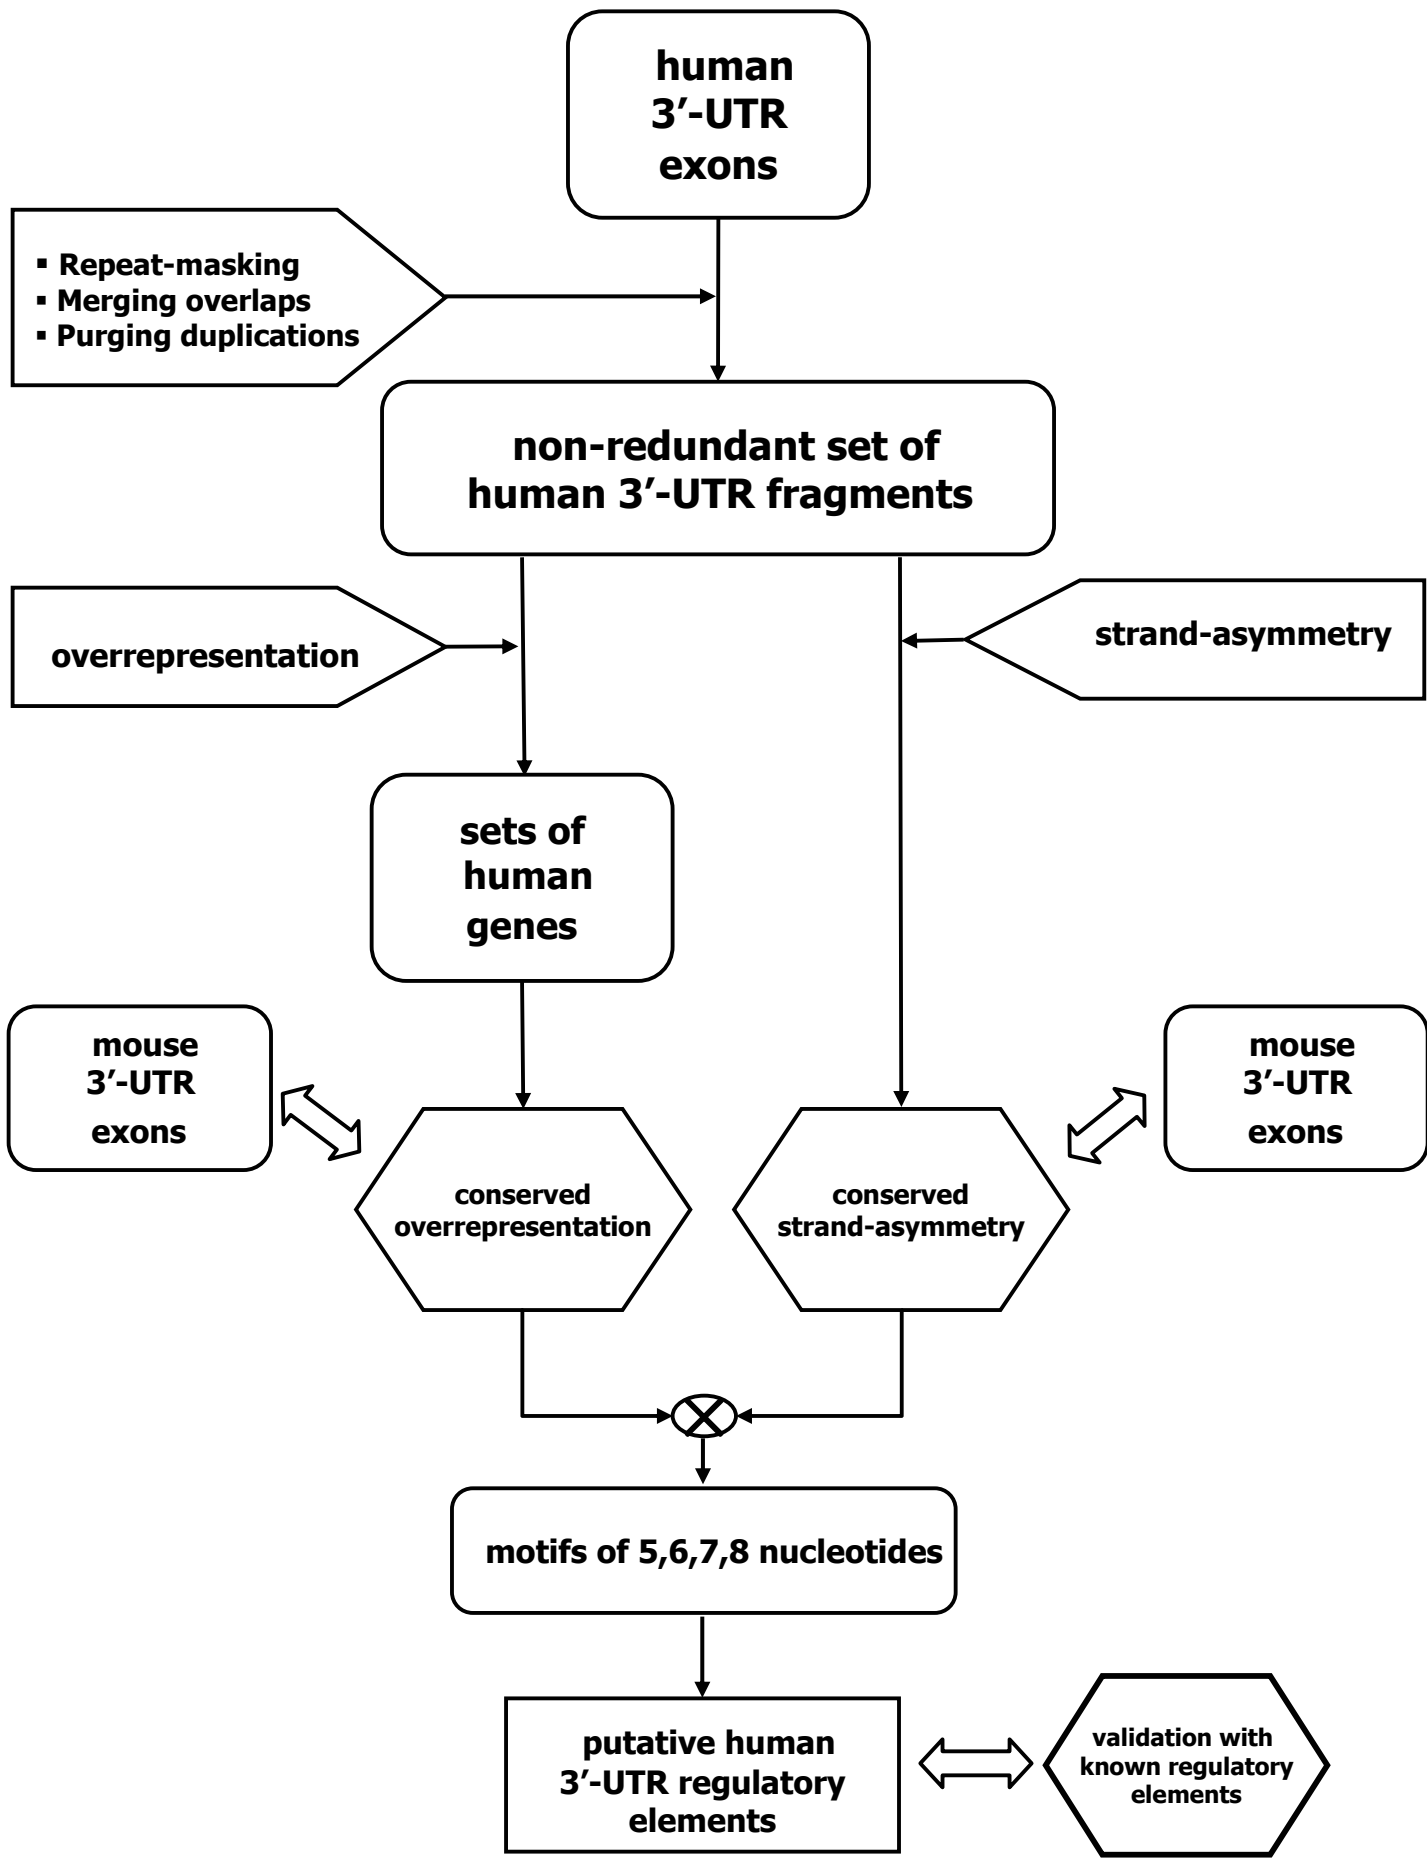

Supplement: 12859_2006_1546_MOESM14_ESM.pdf [file 12859_2006_1546_MOESM14_ESM.pdf]
